# Supplementary material for: PRMT1 promotes mitosis of cancer cells through arginine methylation of INCENP
Source: PubMed Central journal article supplement (PMC4742097; doi:10.18632/oncotarget.6050), 2015-10-09
Supplement: oncotarget-06-35173-s001.pdf [file oncotarget-06-35173-s001.pdf]

# PRMT1 promotes mitosis of cancer cells through arginine methylation of INCENP

## Supplementary Material

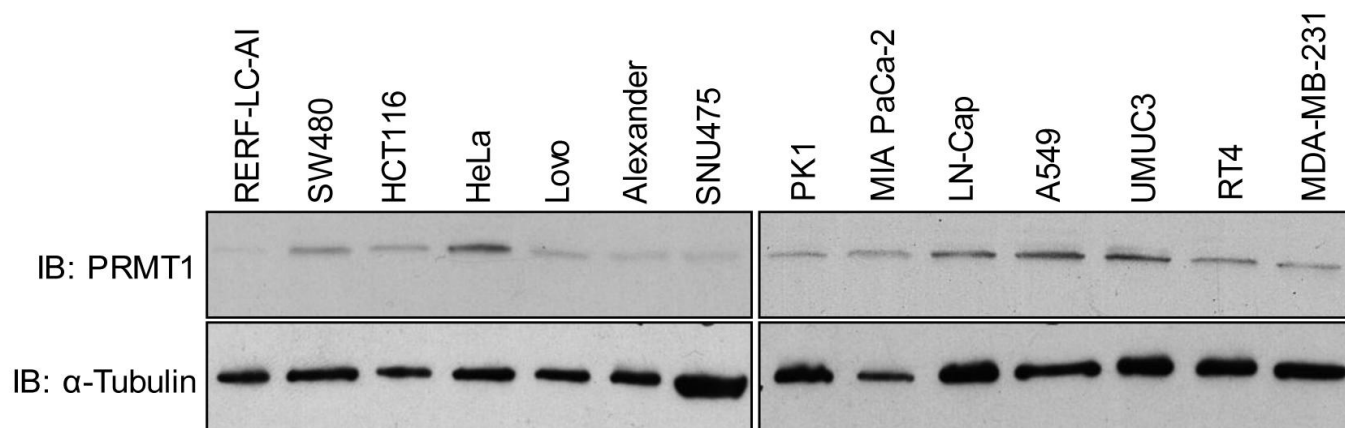

**Figure S1: Protein expression levels of PRMT1 in various types of cancer cell lines.** Fourteen cancer cell lines were lysed with CelLytic M reagent and samples were immunoblotted with an anti-PRMT1 antibody.  $\alpha$ -Tubulin protein expression was used as an internal control.

**A**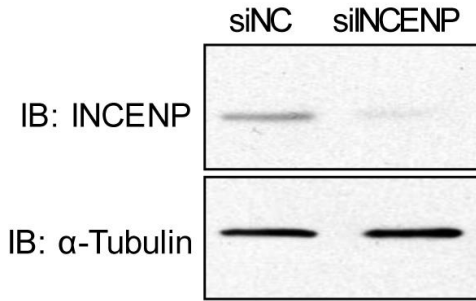**B**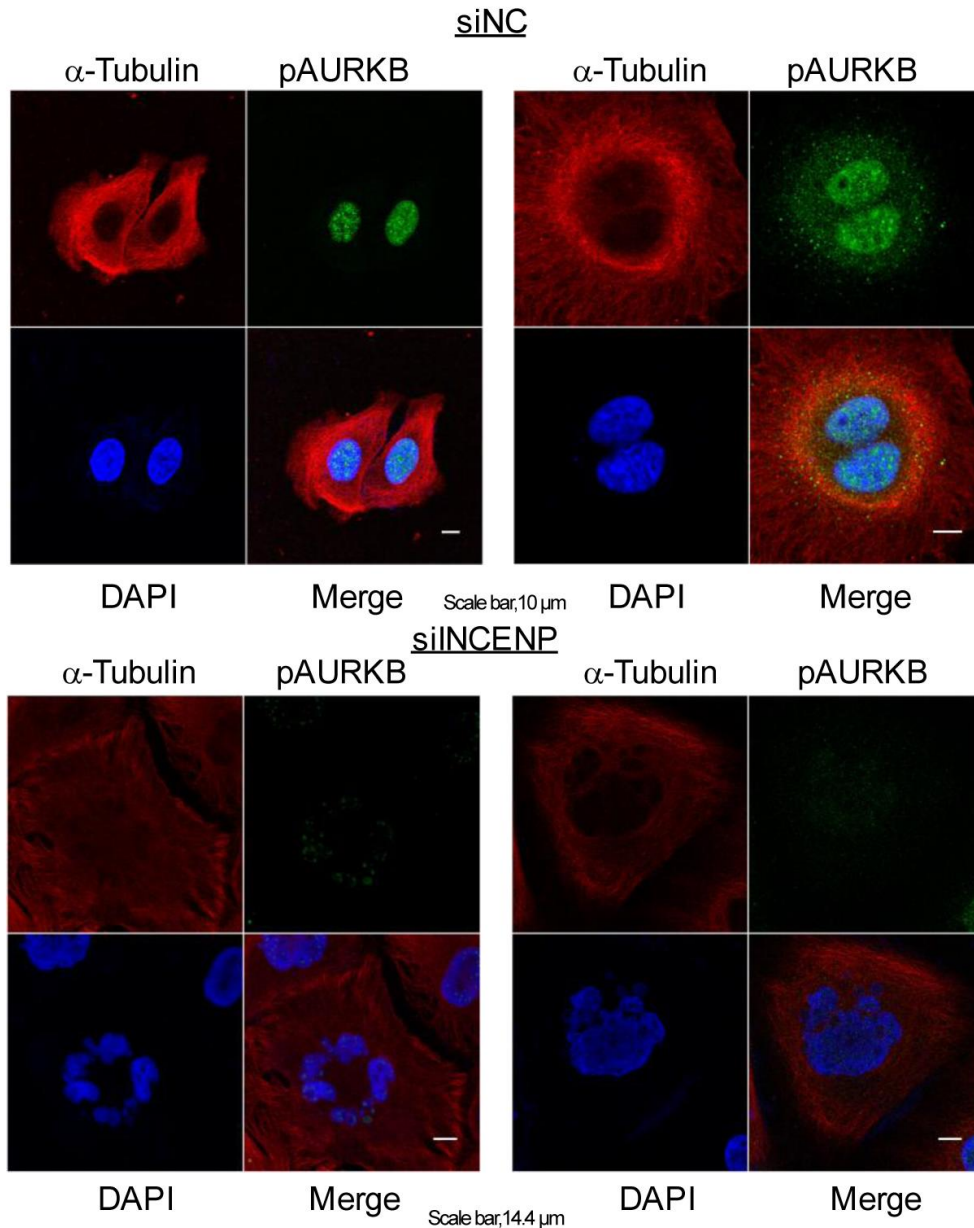

**Figure S2: Knockdown of INCENP results in abnormal chromosome alignment and segregation.** (A) HeLa cells were transfected with siNC and siINCENP for 72 h. Samples were immunoblotted with anti-INCENP and anti- $\alpha$ -Tubulin antibodies. (B) HeLa cells were transfected with siNC and siINCENP for 72 h. Cells were fixed with 4% paraformaldehyde, and stained with anti- $\alpha$ -Tubulin (Alexa Fluor<sup>®</sup> 594 [red]), anti-phospho AURKB antibodies, and 4',6'-diamidino-2'-phenylindole dihydrochloride (DAPI [blue]).

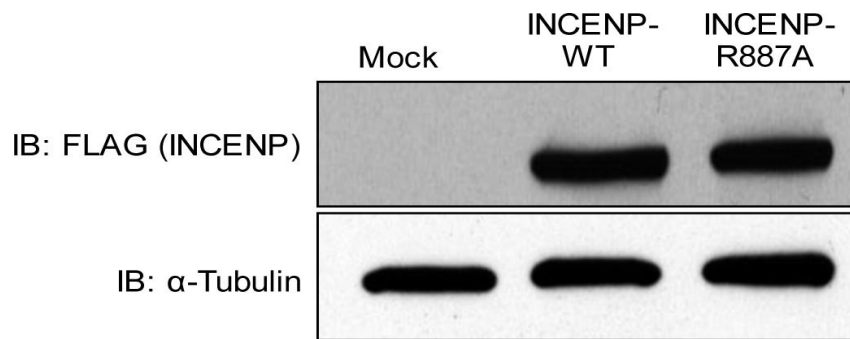

**Figure S3: Expression check of FLAG-INCENP-WT and FLAG- INCENP-R887A in HeLa cells in Figure 5B.** Samples were immunoblotted with anti-FLAG and anti- $\alpha$ -Tubulin antibodies.

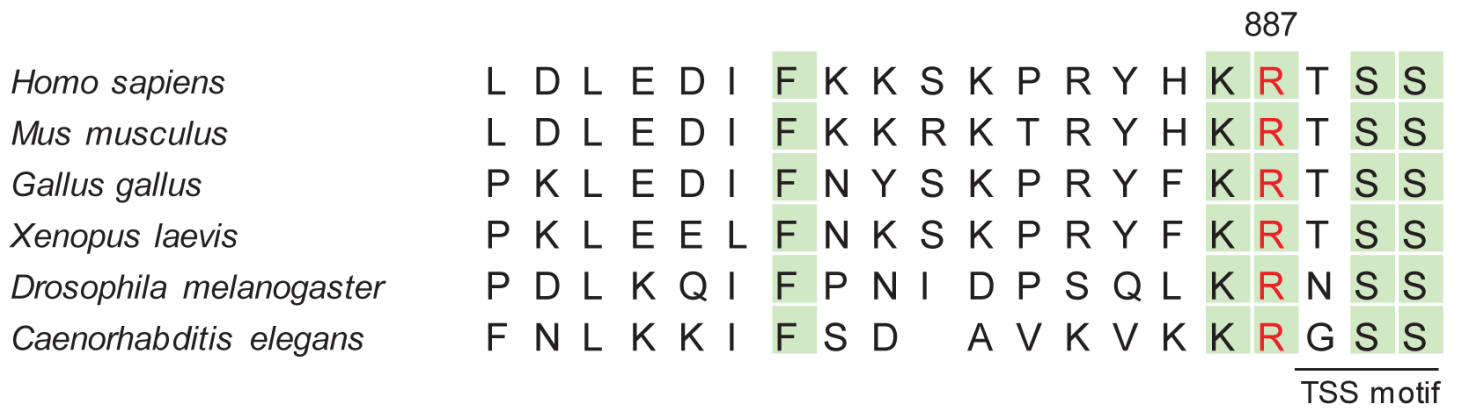

**Figure S4: Amino acid sequence alignment of the IN-domain of INCENP. R887 is conserved among various species.** Green color highlights the amino acid that is conserved from *Caenorhabditis elegans* to *Homo sapiens*.

**Table S1: Information of certificated cell lines**

| <b>Name</b> | <b>Certification institution</b> | <b>Tested method</b> | <b>DNA profile</b>                                                                                                        |
|-------------|----------------------------------|----------------------|---------------------------------------------------------------------------------------------------------------------------|
| <b>293T</b> | ATCC                             | STR                  | Amelogenin: X CSF1PO: 11, 12 D13S317: 12, 14 D16S539: 9, 13 D5S818: 8, 9 D7S820: 11 THO1: 7, 9.3 TPOX: 11 vWA: 16, 18, 19 |
| <b>HeLa</b> | ATCC                             | STR                  | Amelogenin: X,Y CSF1PO: 11,12 D13S317: 11,14 D16S539: 9,11 D5S818: 11,12 D7S820: 10,11 THO1: 8 TPOX: 8 vWA: 15            |
| <b>A549</b> | ATCC                             | STR                  | Amelogenin: X,Y CSF1PO: 10,12 D13S317: 11 D16S539: 11,12 D5S818: 11 D7S820: 8,11 THO1: 8,9.3 TPOX: 8,11 vWA: 14           |

ATCC; American Type Culture Collection

**Table S2: siRNA sequences**

| siRNA name                    |           | Sequence            |                     |
|-------------------------------|-----------|---------------------|---------------------|
| siEGFP                        | Sense     | GCAGCACGACUUCUUCAAG |                     |
|                               | Antisense | CUUGAAGAAGUCGUGCUGC |                     |
| siNegative control (cocktail) | Target #1 | Sense               | AUCCGCGCGAUAGUACGUA |
|                               |           | Antisense           | UACGUACUAUCGCGCGGAU |
|                               | Target #2 | Sense               | UUACGCGUAGCGUAAUACG |
|                               |           | Antisense           | CGUAUUACGCUACGCGUAA |
|                               | Target #3 | Sense               | UAUUCGCGCGUAUAGCGGU |
|                               |           | Antisense           | ACCGCUAUACGCGCGAAUA |
| siPRMT1#1                     | Sense     | GAGUUCACACGCUGCCACA |                     |
|                               | Antisense | UGUGGCAGCGUGUGAACUC |                     |
| siPRMT1#2                     | Sense     | GCCACAAGAGGACCGGCUU |                     |
|                               | Antisense | AAGCCGGUCCUCUUGUGGC |                     |
| siINCENP                      | Sense     | CUCAGAAGAACCGACGGAA |                     |
|                               | Antisense | UCCGUCGGUUCUUCUGAG  |                     |
